# Supplementary material for: Increase in Leptin and PPAR-γ Gene Expression in Lipedema Adipocytes Differentiated in vitro from Adipose-Derived Stem Cells
Source: PubMed Central journal article supplement (PMC7072543; doi:10.3390/cells9020430), 2020-02-12
Supplement: cells-09-00430-s001.pdf [file cells-09-00430-s001.pdf]

Alizarin Red Quantification

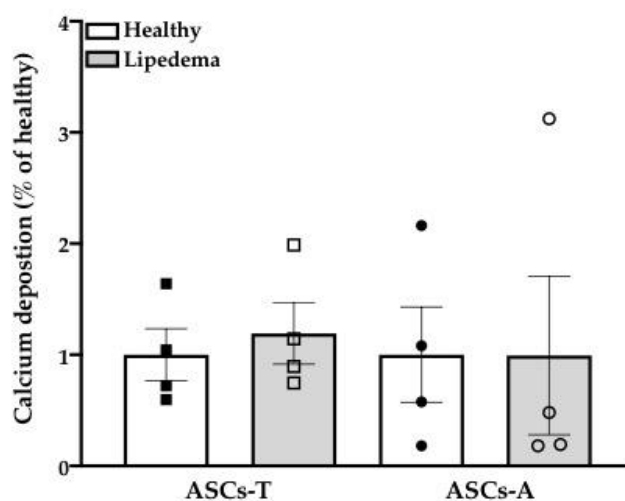

**Figure S1.** Quantitative analysis of alizarin red by spectrophotometry showing no difference in osteogenic differentiation between healthy and lipedema ASCs-T or healthy and lipedema ASCs-A ( $n = 4$  per group). Results are displayed as scatter plots with bar. Values are mean  $\pm$  SEM.

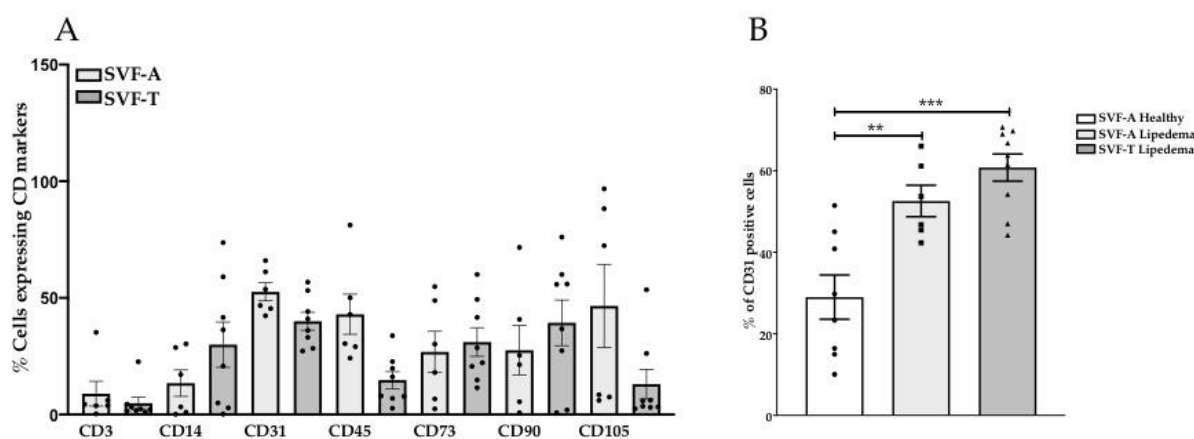

**Figure S2.** Flow cytometry analysis of SVFs. (A) SVFs showed a similar expression of stemness and surface markers between lipedema patients (SVF-A,  $n = 6$ ; SVF-T,  $n = 8$ ). (B) CD31 marker expression in SVFs showed a significant increase in lipedema patients compared to healthy patients (SVF-A healthy,  $n = 8$ ; SVF-T lipedema,  $n = 6$ ; SVF-A lipedema,  $n = 9$ ). Results are displayed as scatter plots with bar. Values are mean  $\pm$  SEM. \*\*  $p < 0.01$  \*\*\*  $p < 0.001$ .

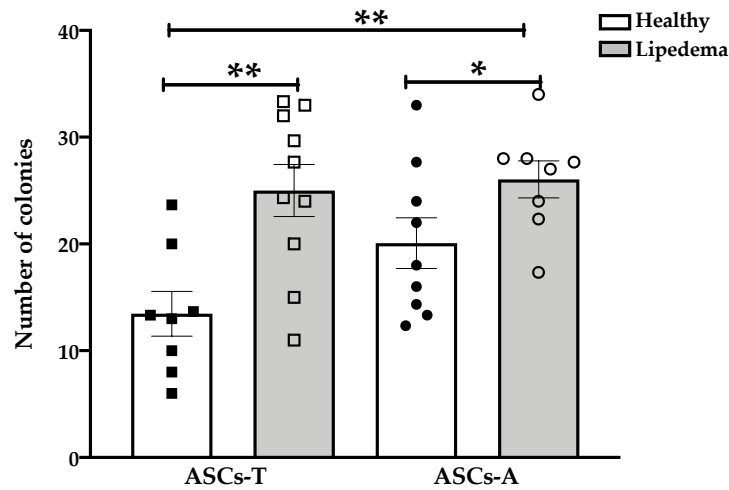

**Figure S3.** Quantitative analysis of CFU assay revealed a significant increase in the colony-forming potential of lipedema ASCs compared with healthy patients as well as a significant decrease between healthy ASCs-T and lipedema ASCs-A (ASCs-T: healthy  $n = 8$  and lipedema  $n = 10$ ; ASCs-A: healthy  $n = 9$  and lipedema  $n = 8$ ). Results are displayed as scatter plots with bar. Values are mean  $\pm$  SEM. \* $p < 0.05$ , \*\* $p < 0.01$ .

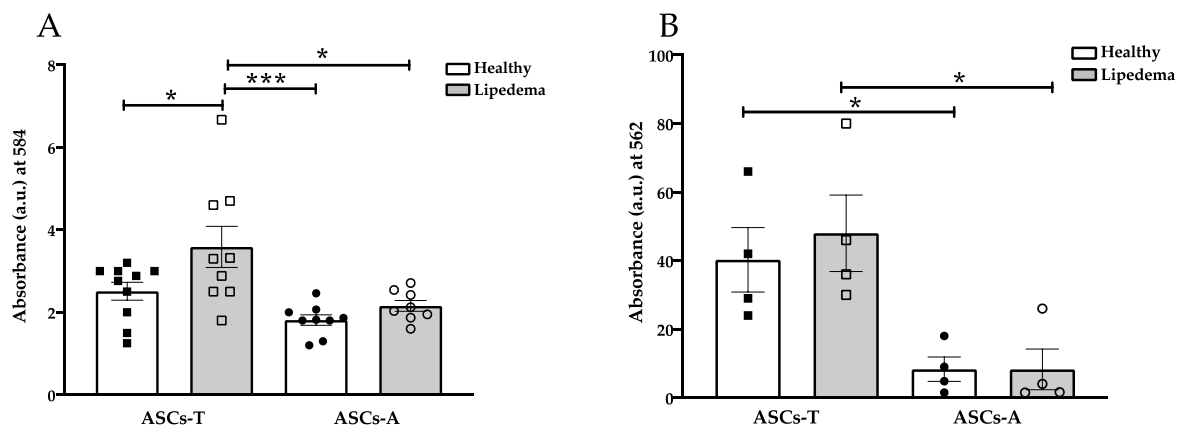

**Figure S4.** Quantitative analysis of Oil Red O (A) and Alizarin red (B) by spectrophotometry showing a significant decrease in adipogenic and osteogenic differentiation potential in lipedema ASCs-A compared to lipedema ASCs-T ( $p < 0.05$ ) and a significant decrease in the osteogenic potential in healthy ASCs-A compared to healthy ASCs-T, but no difference was shown in their adipogenic potential (Adipogenic differentiation ASCs-T: healthy  $n = 10$  and lipedema  $n = 9$ , ASCs-A:  $n = 8$  per group, Osteogenic differentiation,  $n = 4$  per group).
